# Supplementary material for: High-Performance Biomemristor Embedded with Graphene Quantum Dots
Source: MDPI journal article supplement (doi:10.3390/nano13233021), 2023-11-25
Supplement: s1 [file s1]

# **Supporting Information**

## **High-performance biomemristor embedded with graphene quantum dots**

*Lu Wang\*, Jing Yang, Xiafan Zhang and Dianzhong Wen*

*School of Electronic Engineering, Heilongjiang University, Harbin, 150080, China*

Corresponding Author's email: wanglu@hlju.edu.cn

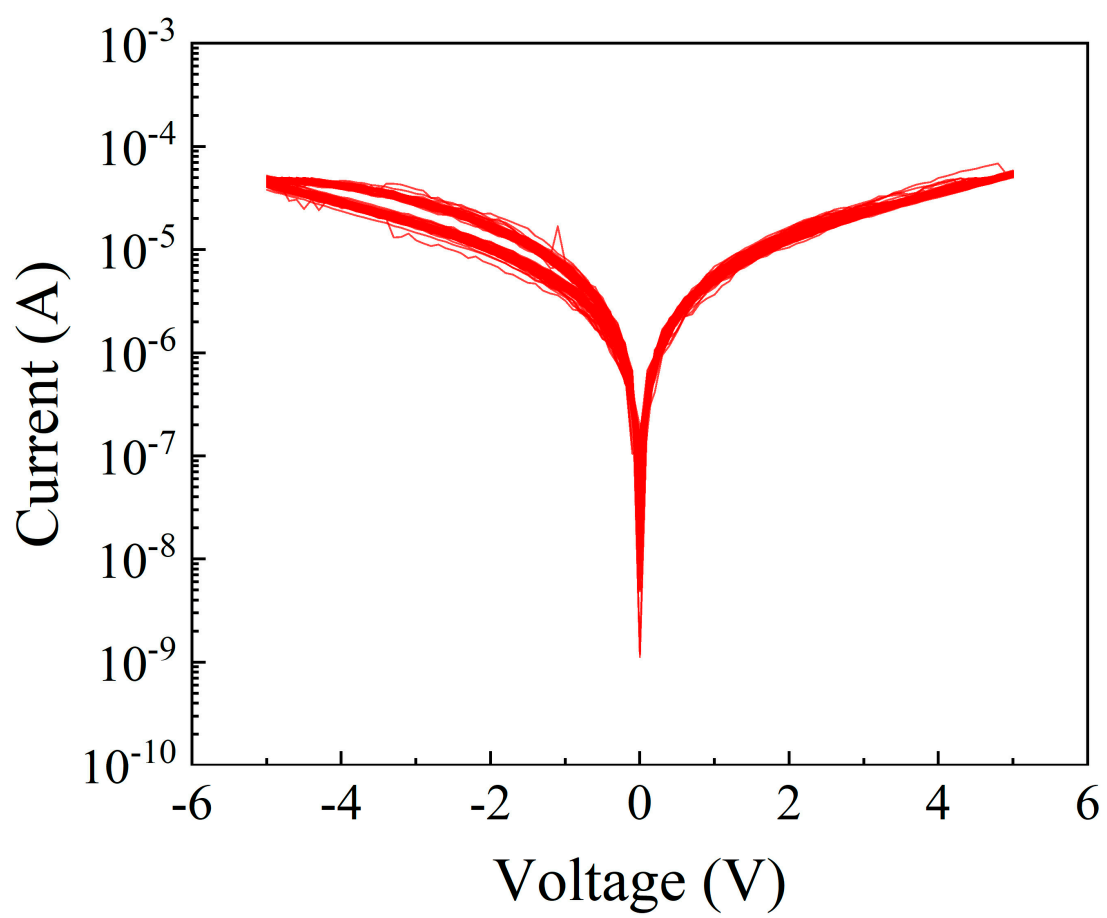

**Figure S1.** I-V characteristics of 40 units for Al/PMMA/ITO memristors.
